# Supplementary material for: Lactiplantibacillus pentoses CCFM1227 Produces Desaminotyrosine to Protect against Influenza Virus H1N1 Infection through the Type I Interferon in Mice
Source: MDPI journal article supplement (doi:10.3390/nu15163659), 2023-08-21
Supplement: s1 [file s1]

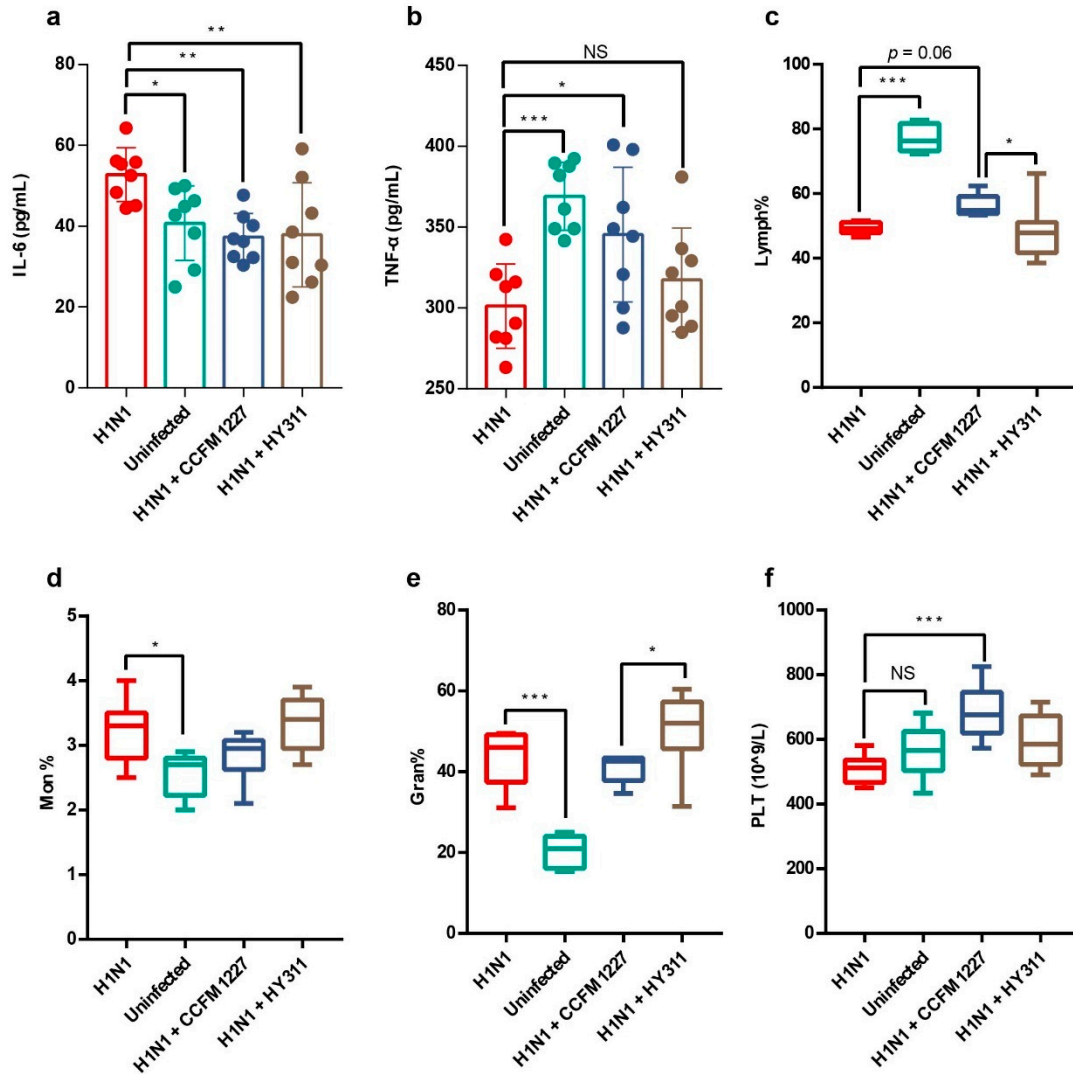

Figure S1. *L. pentosus* CCFM1227 regulates levels of cytokines and blood cells. Levels of (a) IL-6 and (b) TNF-α in the serum. Proportions of (c) lymphocytes (Lymph%), (d) monocytes (Mon%), and (e) granulocytes (Gran%). (f) Platelets (PLTs) in blood. n=8; \*p < 0.05, \*\*p < 0.01, \*\*\*p < 0.001, NS: no significance.
